# Supplementary material
Source: Royal Society of Chemistry journal article supplement (doi:10.1039/d5nr05006e)
Supplement: d5nr05006e1.pdf [file d5nr05006e1.pdf]

## Supporting Information

### **A porous van der Waals single-crystal of aromatic dendrimer exhibiting enhanced thermally activated delayed fluorescence**

Shingo Makihara,<sup>a</sup> Sae Nakajima,<sup>a</sup> Hiroyasu Sato,<sup>b</sup> Osamu Oki,<sup>a,c</sup> Takahiro Kondo,<sup>a,c</sup> Yuki Akanuma,<sup>d</sup> Ken Albrecht,<sup>\*d</sup> Hiroshi Yamagishi<sup>\*,a,c</sup> and Yohei Yamamoto<sup>\*,a,c</sup>

- <sup>a</sup> Department of Materials Science, Institute of Pure and Applied Sciences, University of Tsukuba, 1-1-1 Tennodai, Tsukuba, Ibaraki 305-8573, Japan.
- <sup>b</sup> Rigaku Corporation, 12-9-3 Matsubara, Akishima, Tokyo 196-8666, Japan.
- <sup>c</sup> Tsukuba Research Center for Energy Materials Science(TREMS), Hydrogen Boride Research Center (HBRC), Tsukuba Institute for Advanced Research (TIAR), University of Tsukuba, 1-1-1 Tennodai, Tsukuba, Ibaraki 305-8573, Japan.
- <sup>d</sup> Institute for Materials Chemistry and Engineering, Kyushu University, 6-1 Kasuga-koen, Fukuoka 816-8580, Japan.

## Materials and Methods.

Unless otherwise noted, all reagents and solvents were used as received from Aldrich Chemical Co. Ltd, Tokyo Chemical Industry Co. Ltd and FUJIFILM Wako Pure Chemical Co. The triazine-carbazole dendrimer was synthesized according to the reported procedures.<sup>32</sup>

Steady-state photoluminescence (PL) spectra were recorded on a JASCO FP8500 spectrofluorometer.

Scanning electron microscopy was performed on a Hitachi model SU-8020 FE-SEM operating at 1 kV. Silicon was used as a substrate.

Powder X-ray diffraction was conducted at 25 °C on a RIGAKU model Miniflex600 diffractometer with a Cu K $\alpha$  radiation source (40 kV and 15 mA), equipped with model D/Tex Ultra2-MF high-speed 1D detector.

Variable temperature XRD experiment was performed in a SmartLab diffractometer (Cu K $\alpha$ , 45 kV, 200 mA, Rigaku) equipped with a variable temperature chamber (TTK 600, Anton Paar) and pixel array Hy-Pix-3000 detector. The sample was placed on a non-diffractive silicon sample plate, and the chamber was repeatedly evacuated using a rotary pump and replaced with nitrogen three times. Finally, the chamber was purged with nitrogen at 1 atm. Measurements were performed in the temperature range of 100 K to 300 K upon cooling and heating with the step of 50 K and 25 K. The temperature increase and decrease rates were 5 K min<sup>-1</sup>, and measurements were performed after holding the temperature for 5 minutes to ensure uniformity of the sample temperature. Powder XRD data was collected in the range of  $2^\circ \leq 2\theta \leq 40^\circ$  with a step size and scan speed of 0.02°/step and 20° min<sup>-1</sup>, respectively.

Continuous rotation 3D electron diffraction data were acquired using the dedicated electron diffractometer JEOL/Rigaku XtaLAB Synergy-ED. Data acquisition was performed at ambient temperature with an electron wavelength of 0.0251 Å (200 kV). The data were processed using CrysAlis<sup>Pro</sup> for ED, the structure was solved using SHELXT<sup>S1</sup> and the refinement was done by full-matrix least squares on F<sup>2</sup> (SHELXL)<sup>S2</sup>, using the Olex2 software package<sup>S3</sup>. Solvent masking was applied during structure refinement. Before solvent masking instruction, structure was refined anisotropically and hydrogen atoms were placed into positions calculated geometrically. Supplementary crystallographic data were deposited at the Cambridge Crystallographic Data Centre (CCDC) under deposition number CCDC-2505553 (G3TAZ) can be obtained free of charge via [www.ccdc.cam.ac.uk/data\\_request.cif](http://www.ccdc.cam.ac.uk/data_request.cif).

Optical and fluorescent microscope observations were carried out using an Olympus model BX53 upright microscope. For the fluorescent microscopy, the excitation light with wavelength  $\lambda_{\text{ex}} = 340\text{--}390$  nm was used with the long-pass filter (> 410 nm) for the detection of the images.

H<sub>2</sub> adsorption–desorption isotherms up to 12 MPa were obtained at 77 and 298 K using a volumetric BELSORP HP apparatus (MicrotracBEL). The purity of H<sub>2</sub> and He used in experiments was 99.999%. In a N<sub>2</sub>-filled glove box, the sample powder was loaded into the measurement cell, capped with a Swagelok SS-8-VCR-2-GR-5M stainless-steel gasket, and assembled with a valve-equipped cell holder. The sealed holder was taken out of the glovebox and then mounted on the instrument without exposure to ambient air. The sample was degassed at room temperature for 12 hours under vacuum. Subsequently, the skeletal volume of the sample at 298 K was determined by dosing He up to 100 kPa. After the skeletal volume measurement, the sample was further degassed at room temperature for 5 hours under vacuum. Afterward, the high-pressure H<sub>2</sub> sorption isotherm was measured up to 12 MPa. The equilibrium time was 500 sec, and the measurement was moved to next point if pressure change was within 0.1% of F.S. pressure.

The PL lifetime measurements were performed using Hamamatsu photonics fluorescence lifetime spectrometer C11367 (Quantaaurus-Tau, excitation wavelength of 365nm, and the sample temperature was controlled with an Optistat DN (Oxford Instruments).

The room temperature fluorescence quantum yields were measured by a Hamamatsu Photonics

C9920-02 absolute PL quantum yield measurement system (excitation wavelength: 380 nm).

Variable temperature PL quantum yield (PLQY) measurements were performed by measuring the relative intensity of the PL at several temperatures using a HORIBA JOBIN YVON FluoroMax-4 Spectrometer (excitation wavelength: 365nm, and the sample temperature was controlled with an Optistat DN(Oxford Instruments). The PLQY at various temperatures was calculated by comparison with the room temperature data.

Calculations were performed using TD-DFT at the B3LYP/6-31G(d,p) level based on geometries optimized at the CAM-B3LYP/6-31G(d,p) level. The calculations were performed on a model molecule resembling G3TAZ, in which only a single Cz dendron was retained to reduce the computational cost (Figure S8a). The dihedral angle between the carbazole dendron and the TAZ core was systematically varied, and TD-DFT calculations were performed to determine the  $S_1$  and  $T_1$  energies. All calculations were performed using the Gaussian16 program package<sup>S4</sup>.

## Supplementary Figures and Tables

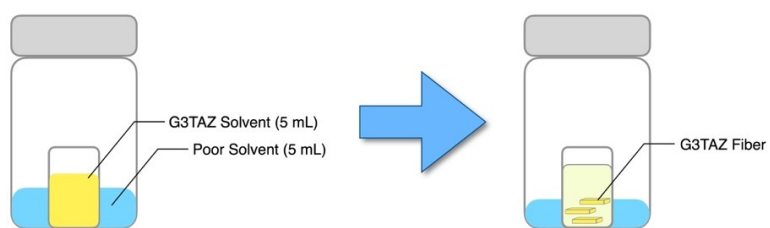

**Figure S1.** Schematic diagram of vapour diffusion method for the synthesis of crystalline G3TAZ powder.

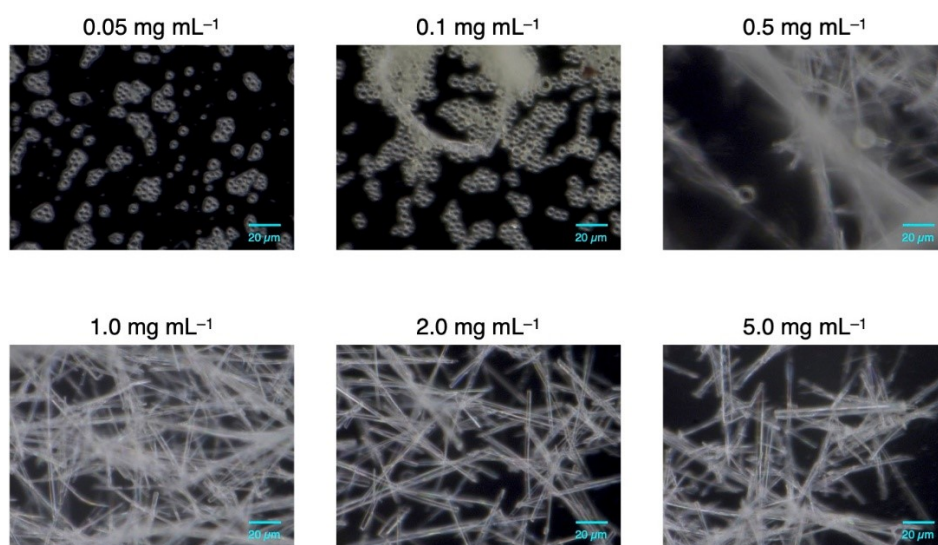

**Figure S2.** Optical microscopic images of G3TAZ precipitates obtained from solution with a concentration of 0.05–5.0 mg mL<sup>-1</sup>.

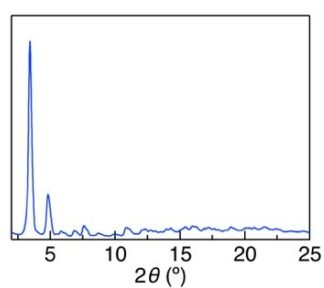

**Figure S3.** A powder XRD pattern of crystalline powder of G3TAZ.

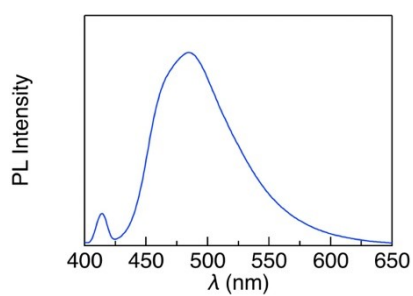

**Figure S4.** PL spectrum of G3TAZ crystals.

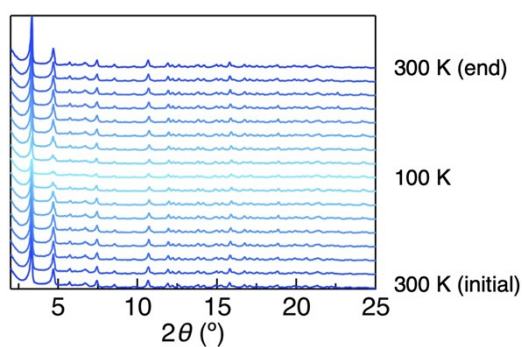

**Figure S5.** Variable-temperature powder X-ray diffraction profiles of G3TAZ collected during continuous cooling (300–100 K) and heating (100–300 K).

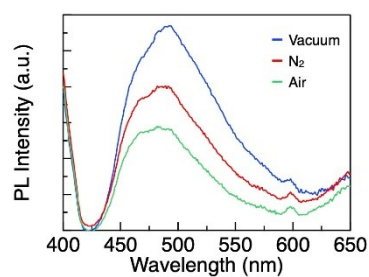

**Figure S6.** PL spectra of G3TAZ under vacuum (blue), N<sub>2</sub> (red), and air (green) at 300 K.

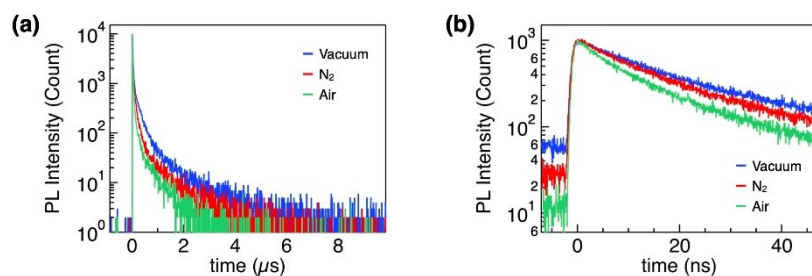

**Figure S7.** (a,b) PL decay profiles of G3TAZ under vacuum (blue), N<sub>2</sub> (red), and air (green) at 300 K (a), together with their magnified view (b).

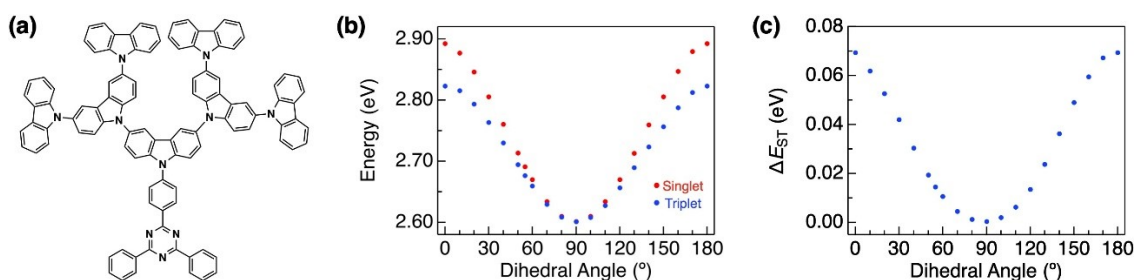

**Figure S8.** (a) Molecular structure of the model used for the TD-DFT calculations, in which a single Cz dendron of G3TAZ was retained to reduce computational cost. (b) Calculated  $S_1$  (red) and  $T_1$  (blue) energies of the model molecule plotted as a function of the dihedral angle between the TAZ core and the Cz dendron. (c) Calculated  $\Delta E_{ST}$  values of the model molecule as a function of the dihedral angle between the TAZ core and the Cz dendron.

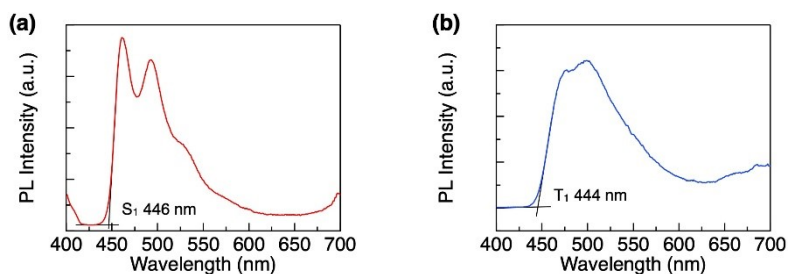

**Figure S9.** (a) Steady-state PL spectrum of G3TAZ at 77 K. (b) PL spectrum of G3TAZ at 77 K measured with a delay time of 10 ms.

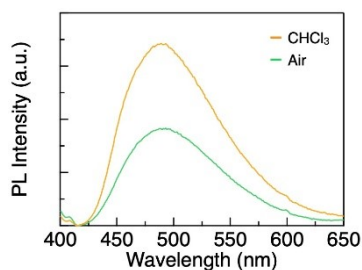

**Figure S10.** PL spectra of G3TAZ under air (green) and  $CHCl_3$  vapor (orange) at 300 K.

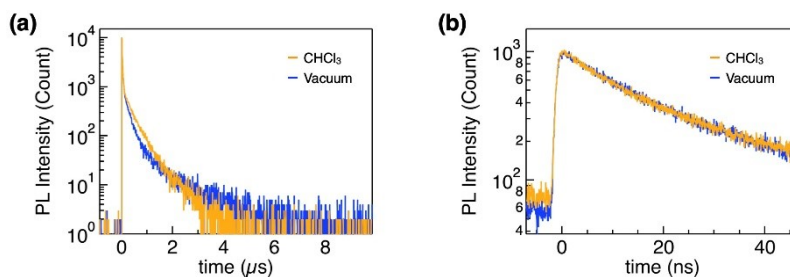

**Figure S11.** (a,b) PL decay profiles of G3TAZ under vacuum (blue) and  $CHCl_3$  vapor (orange) at 300 K.

**Table S1.** Comparison of molecular weight and BET surface area of representative porous molecular crystals sustained by van der Waals interactions. For reference, porous molecular crystals exhibiting intrinsic porosity are also included.

| Material name              | Molecular weight | BET surface area (m <sup>2</sup> g <sup>-1</sup> ) | Extrinsic or Intrinsic | References |
|----------------------------|------------------|----------------------------------------------------|------------------------|------------|
| G3TAZ                      | 3778.3           | 600                                                | Extrinsic              | This Work  |
| Py <sup>open</sup> ·MeCN   | 811.0            | 597                                                | Extrinsic              | S5         |
| (dipPhO) <sub>8</sub> PcCo | 1981.5           | 970                                                | Extrinsic              | 21         |
| <i>E</i> <sub>4</sub> -1c  | 961.3            | 160                                                | Extrinsic              | 23         |
| VPC-1 <sup>yellow</sup>    | 1271.5           | 112                                                | Extrinsic              | S6         |
| Boronic ester cage         | 5629.2           | 3758                                               | Intrinsic              | S7         |
| Porous Organic Cage 2      | 877.1            | 533                                                | Intrinsic              | S8         |
| Porous Organic Cage 3      | 1118.5           | 624                                                | Intrinsic              | S8         |

**Table S2.** Fluorescence decay parameters of G3TAZ sphere.

| G3TAZ Sphere |               |                       |               |                       |                   |                      |                        |
|--------------|---------------|-----------------------|---------------|-----------------------|-------------------|----------------------|------------------------|
| <i>T</i> (K) | $\tau_1$ (ns) | <i>A</i> <sub>1</sub> | $\tau_2$ (ns) | <i>A</i> <sub>2</sub> | Sum <sub>DF</sub> | Sum <sub>Total</sub> | <i>P</i> <sub>DF</sub> |
| 77           | 19.04         | 661.7                 | 847.7         | 172.4                 | 15030             | 88570                | 0.1697                 |
| 100          | 17.93         | 698.0                 | 1425          | 94.66                 | 13850             | 90100                | 0.1537                 |
| 125          | 19.55         | 674.6                 | 2156          | 65.58                 | 14240             | 80820                | 0.1762                 |
| 150          | 18.52         | 672.4                 | 2270          | 61.29                 | 14420             | 79030                | 0.1825                 |
| 175          | 16.65         | 698.9                 | 3159          | 56.09                 | 17130             | 73840                | 0.2321                 |
| 200          | 18.54         | 692.1                 | 3281          | 79.63                 | 26110             | 83860                | 0.3113                 |
| 225          | 17.05         | 689.8                 | 2958          | 97.35                 | 28840             | 85230                | 0.3384                 |
| 250          | 17.86         | 699.8                 | 2974          | 114.6                 | 34570             | 83900                | 0.4121                 |
| 275          | 17.39         | 701.0                 | 2082          | 162.1                 | 34680             | 87810                | 0.3949                 |
| 300          | 16.76         | 741.3                 | 1849          | 248.8                 | 32150             | 78020                | 0.4122                 |

*T* : Measured temperature

$\tau_1$  : Fluorescence lifetime of fast fluorescent component

$\tau_2$  : Fluorescence lifetime of delayed fluorescent component

*A*<sub>1</sub> : Fluorescence intensity at the onset of emission for fast fluorescent component

*A*<sub>2</sub> : Fluorescence intensity at the onset of emission for delayed fluorescent component

Sum<sub>DF</sub> : Total number of delayed fluorescent component photons

Sum<sub>Total</sub> : Total number of photons

*P*<sub>DF</sub> : Proportion of delayed fluorescent component

**Table S3.** Fluorescence decay parameters of G3TAZ crystals.

**G3TAZ Crystals**

| $T$ (K) | $\tau_1$ (ns) | $A_1$ | $\tau_2$ (ns) | $A_2$ | Sum <sub>DF</sub> | Sum <sub>Total</sub> | $P_{DF}$ |
|---------|---------------|-------|---------------|-------|-------------------|----------------------|----------|
| 77      | 45.66         | 531.7 | 9747          | 48.17 | 380800            | 163300               | 0.1881   |
| 100     | 42.90         | 826.0 | 7745          | 92.81 | 53380             | 145300               | 0.3673   |
| 125     | 34.20         | 684.5 | 5433          | 181.6 | 85030             | 148700               | 0.5719   |
| 150     | 33.28         | 654.1 | 4737          | 302.3 | 129000            | 185800               | 0.6942   |
| 175     | 27.35         | 554.2 | 3276          | 463.8 | 148400            | 205600               | 0.7220   |
| 200     | 24.48         | 725.2 | 2281          | 638.1 | 147500            | 204100               | 0.7226   |
| 225     | 22.02         | 813.8 | 1692          | 737.0 | 127700            | 177100               | 0.7214   |
| 250     | 19.88         | 668.3 | 820.4         | 1047  | 88470             | 136800               | 0.6466   |
| 275     | 19.14         | 802.0 | 426.0         | 1067  | 46850             | 95750                | 0.4893   |
| 300     | 18.89         | 871.4 | 260.5         | 874.8 | 23780             | 59920                | 0.3968   |

**Table S4.** Fluorescence decay parameters of G3TAZ cast film.

**G3TAZ Cast film**

| $T$ (K) | $\tau_1$ (ns) | $A_1$ | $\tau_2$ (ns) | $A_2$ | Sum <sub>DF</sub> | Sum <sub>Total</sub> | $P_{DF}$ |
|---------|---------------|-------|---------------|-------|-------------------|----------------------|----------|
| 77      | 18.10         | 39.88 | 898.5         | 115.2 | 10660             | 75320                | 0.1415   |
| 100     | 17.43         | 39.84 | 944.6         | 115.5 | 11230             | 71440                | 0.1571   |
| 125     | 18.29         | 40.27 | 1539          | 69.37 | 10950             | 71980                | 0.1521   |
| 150     | 19.00         | 40.19 | 4221          | 45.02 | 17660             | 71690                | 0.2463   |
| 175     | 18.42         | 39.34 | 3595          | 55.29 | 19120             | 76150                | 0.2510   |
| 200     | 18.01         | 41.78 | 4247          | 70.14 | 27640             | 80070                | 0.3451   |
| 225     | 18.13         | 41.02 | 4137          | 85.90 | 32970             | 85920                | 0.3837   |
| 250     | 17.78         | 42.13 | 3279          | 106.4 | 34070             | 84410                | 0.4036   |
| 275     | 17.26         | 42.92 | 2878          | 147.8 | 36230             | 84500                | 0.4288   |
| 300     | 17.61         | 43.54 | 2092          | 189.1 | 35700             | 82100                | 0.4348   |

**Table S5.** Fluorescence decay parameters of G3TAZ crystals under vacuum, N<sub>2</sub>, air, and CHCl<sub>3</sub>.

| Atmosphere        | $\tau_1$ (ns) | A <sub>1</sub> | $\tau_2$ (ns) | A <sub>2</sub> | Sum <sub>DF</sub> | Sum <sub>Total</sub> | P <sub>DF</sub> |
|-------------------|---------------|----------------|---------------|----------------|-------------------|----------------------|-----------------|
| Vacuum            | 18.64         | 953.1          | 331.2         | 850.1          | 27190             | 55760                | 0.4876          |
| N <sub>2</sub>    | 14.17         | 915.1          | 331.2         | 491.7          | 15710             | 41220                | 0.3811          |
| Air               | 11.84         | 935.7          | 344.8         | 519.0          | 17230             | 39880                | 0.4321          |
| CHCl <sub>3</sub> | 17.06         | 965.7          | 392.6         | 980.1          | 36730             | 63300                | 0.5803          |

**Table S6.** Calculated total energies of the singlet and triplet excited states and the resulting  $\Delta E_{ST}$  values of G3TAZ with dihedral angles of 80° and 55°, representing the conformations in the crystalline and amorphous states, respectively.

|           | Dihedral angle (°) | Singlet (eV) | Triplet (eV) | $\Delta E_{ST}$ (eV) |
|-----------|--------------------|--------------|--------------|----------------------|
| Crystal   | 80                 | 2.6099       | 2.6087       | 0.0012               |
| Amorphous | 55                 | 2.6909       | 2.6764       | 0.0145               |

## Supplementary references

- S1 G. M. Sheldrick, *Acta Cryst. A*, 2015, **71**, 3–8.
- S2 G. M. Sheldrick, *Acta Cryst. C*, 2015, **71**, 3–8.
- S3 O. V. Dolomanov, L. J. Bourhis, R. J. Gildea, J. A. K. Howard and H. Puschmann, *J. Appl. Cryst.*, 2009, **42**, 339–341.
- S4 Gaussian 16, Revision C.01, M. J. Frisch, G. W. Trucks, H. B. Schlegel, G. E. Scuseria, M. A. Robb, J. R. Cheeseman, G. Scalmani, V. Barone, G. A. Petersson, H. Nakatsuji, X. Li, M. Caricato, A. V. Marenich, J. Bloino, B. G. Janesko, R. Gomperts, B. Mennucci, H. P. Hratchian, J. V. Ortiz, A. F. Izmaylov, J. L. Sonnenberg, D. Williams-Young, F. Ding, F. Lipparini, F. Egidi, J. Goings, B. Peng, A. Petrone, T. Henderson, D. Ranasinghe, V. G. Zakrzewski, J. Gao, N. Rega, G. Zheng, W. Liang, M. Hada, M. Ehara, K. Toyota, R. Fukuda, J. Hasegawa, M. Ishida, T. Nakajima, Y. Honda, O. Kitao, H. Nakai, T. Vreven, K. Throssell, J. A. Montgomery, Jr., J. E. Peralta, F. Ogliaro, M. J. Bearpark, J. J. Heyd, E. N. Brothers, K. N. Kudin, V. N. Staroverov, T. A. Keith, R. Kobayashi, J. Normand, K. Raghavachari, A. P. Rendell, J. C. Burant, S. S. Iyengar, J. Tomasi, M. Cossi, J. M. Millam, M. Klene, C. Adamo, R. Cammi, J. W. Ochterski, R. L. Martin, K. Morokuma, O. Farkas, J. B. Foresman and D. J. Fox, *Gaussian, Inc., Wallingford CT.*, 2019.
- S5 H. Yamagishi, M. Tsunoda, K. Iwai, K. Hengphasatporn, Y. Shigeta, H. Sato and Y. Yamamoto, *Commun. Chem.*, 2021, **4**, 122.
- S6 H. Yamagishi, S. Nakajima, J. Yoo, M. Okazaki, Y. Takeda, S. Minakata, K. Albrecht, K. Yamamoto, I. Badía-Domínguez, M. M. Oliva, M. C. R. Delgado, Y. Ikemoto, H. Sato, K. Imoto, K. Nakagawa, H. Tokoro, S. Ohkoshi and Y. Yamamoto, *Commun. Chem.*, 2020, **3**, 118.
- S7 G. Zhang, O. Presly, F. White, I. M. Oppel and M. Mastalerz, *Angew. Chem. Int. Ed.*, 2014, **53**, 1516–1520.
- S8 T. Tozawa, J. T. A. Jones, S. I. Swamy, S. Jiang, D. J. Adams, S. Shakespeare, R. Clowes, D. Bradshaw, T. Hasell, S. Y. Chong, C. Tang, S. Thompson, J. Parker, A. Trewin, J. Bacsa, A. M. Z. Slawin, A. Steiner and A. I. Cooper, *Nat. Mater.*, 2009, **8**, 973–978.
